# Supplementary material for: No one tool to rule them all: prokaryotic gene prediction tool annotations are highly dependent on the organism of study
Source: Bioinformatics. 2021 Dec 7;38(5):1198–207. doi: 10.1093/bioinformatics/btab827 (PMC8825762; doi:10.1093/bioinformatics/btab827)
Supplement: btab827_Supplementary_Data [file btab827_supplementary_data.zip]

Archive with 4 entries (4 files):
- Supplementary.pdf
- Supplementary_Rankings.xlsx
- Supplementary_Results_1.xlsx
- Supplementary_Results_2.xlsx
