# Supplementary material for: No one tool to rule them all: prokaryotic gene prediction tool annotations are highly dependent on the organism of study
Source: Bioinformatics. 2021 Dec 7;38(5):1198–207. doi: 10.1093/bioinformatics/btab827 (PMC8825762; doi:10.1093/bioinformatics/btab827)
Supplement: btab827_Supplementary_Data [file btab827_supplementary_data.zip › Supplementary_Results_2.xlsx]

## Sheet: Data
Bacillus subtilis (B. subtilis) - Strain BEST7003 - Assembly ASM52304v1
Tool	Number_of_ORFs	Percent_Difference_of_All_ORFs	Number_of_ORFs_that_Detected_a_Gene	Percentage_of_ORFs_that_Detected_a_Gene	Number_of_Genes_Detected	Percentage_of_Genes_Detected	Median_Length_of_All_ORFs	Median_Length_Difference	Minimum_Length_of_All_ORFs	Minimum_Length_Difference	Maximum_Length_of_All_ORFs	Maximum_Length_Difference	Median_GC_content_of_All_ORFs	Percent_Difference_of_All_ORFs_Median_GC	Median_GC_content_of_Matched_ORFs	Percent_Difference_of_Matched_ORF_GC	Number_of_ORFs_which_Overlap_Another_ORF	Percent_Difference_of_Overlapping_ORFs	Maximum_ORF_Overlap	Median_ORF_Overlap	Number_of_Matched_ORFs_Overlapping_Another_ORF	Percent_Difference_of_Matched_ORFs_Overlapping_Another_ORF	Maximum_Matched_ORF_Overlap	Median_Matched_ORF_Overlap	Number_of_Short-ORFs	Percent_Difference_of_Short-ORFs	Number_of_Short-Matched-ORFs	Percent_Difference_of_Short-Matched-ORFs	Number_of_Perfect_Matches	Percentage_of_Perfect_Matches	Number_of_Perfect_Starts	Percentage_of_Perfect_Starts	Number_of_Perfect_Stops	Percentage_of_Perfect_Stops	Number_of_Out_of_Frame_ORFs	Number_of_Matched_ORFs_Extending_a_Coding_Region	Percentage_of_Matched_ORFs_Extending_a_Coding_Region	Number_of_Matched_ORFs_Extending_Start_Region	Percentage_of_Matched_ORFs_Extending_Start_Region	Number_of_Matched_ORFs_Extending_Stop_Region	Percentage_of_Matched_ORFs_Extending_Stop_Region	Number_of_All_ORFs_on_Positive_Strand	Percentage_of_All_ORFs_on_Positive_Strand	Number_of_All_ORFs_on_Negative_Strand	Percentage_of_All_ORFs_on_Negative_Strand	Median_Start_Difference_of_Matched_ORFs	Median_Stop_Difference_of_Matched_ORFs	ATG_Start_Percentage	GTG_Start_Percentage
Bacillus Details	Number of Protein Coding Genes 4011						767	N/A	119	N/A	15131	N/A	44.19				857		118	3	857		118	3	548				N/A	N/A	N/A	N/A	N/A	N/A	N/A	N/A	N/A	N/A	N/A	N/A	N/A	1922		2089		N/A	N/A	76.81	10.1
GeneMarkS	4118	2.67	3964	96.26	3964	98.83	758	-1.17	80	-32.77	15131	0	44.17	-0.06	44.22	0.06	923	7.7	82	3	863	0.7	82	3	624	13.87	490	-10.58	3730	94.1	3730	94.1	3964	100	4	0	0	160	4.04	0	0	0	0	0	0	3	N/A	77.44	9.3
Prodigal	4016	0.12	3943	98.18	3943	98.3	767	0	89	-25.21	15131	0	44.19	-0.01	44.22	0.07	874	1.98	99	3	845	-1.4	99	3	534	-2.55	472	-13.87	3673	93.15	3673	93.15	3943	100	4	0	0	177	4.49	0	0	0	0	0	0	3	N/A	78.69	9.49
MetaGeneAnnotator	4038	0.67	4005	99.18	4005	99.85	764	-0.39	119	0	15131	0	44.2	0.01	44.19	0	889	3.73	118	3	867	1.17	118	3	573	4.56	542	-1.09	3949	98.6	3949	98.6	4005	100	0	0	0	34	0.85	0	0	0	0	0	0	3	N/A	76.35	10.4
GeneMarkS-2	3980	-0.77	3935	98.87	3935	98.11	773	0.78	89	-25.21	15131	0	44.25	0.13	44.26	0.16	828	-3.38	100	3	826	-3.62	100	3	503	-8.21	464	-15.33	3742	95.1	3742	95.1	3935	100	4	0	0	94	2.39	0	0	0	0	0	0	3	N/A	77.14	10
MetaGeneMark	4030	0.47	3922	97.32	3922	97.78	770	0.39	65	-45.38	15131	0	44.14	-0.12	44.2	0.01	940	9.68	82	3	881	2.8	82	3	526	-4.01	426	-22.26	2749	70.09	2749	70.09	3922	100	6	0	0	859	21.9	0	0	0	0	0	0	3	N/A	83.18	9.45
GeneMark.hmm/E. coli Model	4025	0.35	3880	96.4	3880	96.73	764	-0.39	80	-32.77	15131	0	44.17	-0.06	44.25	0.13	889	3.73	82	3	824	-3.85	82	3	565	3.1	442	-19.34	3162	81.49	3162	81.49	3880	100	6	0	0	370	9.54	0	0	0	0	0	0	-3	N/A	84	8.37
GeneMark_HA	4056	1.12	3898	96.1	3898	97.18	767	0	89	-25.21	15131	0	44.17	-0.05	44.23	0.08	1041	21.47	82	3	948	10.62	82	3	538	-1.82	407	-25.73	2622	67.27	2622	67.27	3898	100	8	0	0	985	25.27	0	0	0	0	0	0	3	N/A	83.8	9.22
FragGeneScan	4201	4.74	3916	93.22	3916	97.63	749	-2.35	128	7.56	15131	0	44.16	-0.06	44.18	-0.04	741	-13.54	306	3	713	-16.8	306	3	683	24.64	427	-22.08	2949	75.31	2949	75.31	3916	100	9	0	0	845	21.58	0	0	0	0	0	0	3	N/A	77.05	10.78
GLIMMER-3	4161	3.74	3871	93.03	3871	96.51	749	-2.35	113	-5.04	15134	0.02	44.12	-0.17	44.31	0.26	876	2.22	49	3	736	-14.12	49	3	717	30.84	449	-18.07	2539	65.59	2539	65.59	3871	100	5	0	0	797	20.59	0	0	0	0	0	0	3	N/A	38.45	8.27
MetaGene	3777	-5.83	3692	97.75	3692	92.05	791	3.13	149	25.21	15131	0	44.31	0.28	44.32	0.28	759	-11.44	92	3	733	-14.47	92	3	394	-28.1	364	-33.58	2472	66.96	2472	66.96	3692	100	1	0	0	722	19.56	0	0	0	0	0	0	3	N/A	83.88	7.97
GeneMark.hmm/S. Aureus Model	4096	2.12	3942	96.24	3942	98.28	761	-0.78	80	-32.77	15131	0	44.16	-0.06	44.2	0.01	915	6.77	82	3	827	-3.5	82	3	607	10.77	476	-13.14	3678	93.3	3678	93.3	3942	100	4	0	0	165	4.19	0	0	0	0	0	0	-3	N/A	78.42	9.55
FGENESB/E. coli Model	4024	0.32	3315	82.38	3315	82.65	677	-11.73	62	-47.9	14873	-1.71	44.29	0.21	44.44	0.57	633	-26.14	214	3	461	-46.21	72	3	780	42.34	391	-28.65	2766	83.44	2766	83.44	3315	100	1	0	0	131	3.95	0	0	0	0	0	0	-3	N/A	82.83	8.92
Augutus/S. Aureus Model	3905	-2.64	3807	97.49	3807	94.91	779	1.56	65	-45.38	15131	0	44.21	0.04	44.25	0.14	742	-13.42	1820	3	674	-21.35	58	3	477	-12.96	413	-24.64	3439	90.33	3439	90.33	3807	100	2	0	0	168	4.41	0	0	0	0	0	0	-3	N/A	75.65	10.83
Augutus/E. coli Model	3425	-14.61	3246	94.77	3246	80.93	809	5.48	71	-40.34	14819	-2.06	44.82	1.42	44.85	1.49	485	-43.41	2063	3	430	-49.82	49	3	313	-42.88	260	-52.55	2536	78.13	2536	78.13	3246	100	1	0	0	194	5.98	0	0	0	0	1	0	-3	N/A	82.07	10.22
FGENESB/S. Aureus Model	3982	-0.72	3428	86.09	3428	85.46	698	-9	62	-47.9	12902	-14.73	44.29	0.22	44.22	0.07	628	-26.72	216	3	494	-42.36	120	3	674	22.99	389	-29.01	2972	86.7	2972	86.7	3428	100	2	0	0	108	3.15	0	0	0	0	0	0	-3	N/A	74.69	11.65
TransDecoder	3385	-15.61	3289	97.16	3289	82	860	12.13	299	151.26	15131	0	44.62	0.97	44.61	0.93	663	-22.64	160	3	642	-25.09	160	3	8	-98.54	6	-98.91	2048	62.27	2048	62.27	3289	100	5	0	0	783	23.81	0	0	0	0	0	0	3	N/A	100	0
EasyGene/E. coli Model	3323	-17.15	3244	97.62	3244	80.88	857	11.73	62	-47.9	15131	0	44.67	1.08	44.66	1.06	589	-31.27	985	3	563	-34.31	160	3	111	-79.74	102	-81.39	2758	85.02	2758	85.02	3244	100	1	0	0	142	4.38	0	0	0	0	0	0	-3	N/A	80.86	10.29
GeneMark/E. coli Model	1457	-63.67	928	63.69	928	23.14	695	-9.39	53	-55.46	10763	-28.87	46.46	5.12	46.73	5.73	94	-89.03	1287	3	65	-92.42	124	3	283	-48.36	40	-92.7	418	45.04	418	45.04	928	100	0	0	0	203	21.88	0	0	0	0	0	0	9	N/A	67.81	32.19
Augustus/H. sapiens Model	3140	-21.72	2139	68.12	2139	53.33	794	3.52	3	-97.48	13142	-13.15	45.03	1.9	44.99	1.81	211	-75.38	7070	93	4	-99.53	56	14	396	-27.74	53	-90.33	688	32.16	750	35.06	1986	92.85	253	0	0	229	10.71	0	0	0	0	0	0	3	25	79.3	0.83
GeneMark/S. Aureus Model	2765	-31.06	2295	83	2295	57.22	755	-1.56	38	-68.07	15134	0.02	44.12	-0.16	44.02	-0.4	404	-52.86	3724	3	312	-63.59	241	3	457	-16.61	184	-66.42	1305	56.86	1305	56.86	2295	100	1	0	0	647	28.19	0	0	0	0	1	0	6	N/A	72.77	27.23
EasyGene/S. Aureus Model	3363	-16.16	3090	91.88	3090	77.04	767	0	74	-37.82	15131	0	44.24	0.11	44.13	-0.14	511	-40.37	1285	3	446	-47.96	137	3	244	-55.47	228	-58.39	2820	91.26	2820	91.26	3090	100	1	0	0	55	1.78	0	0	0	0	0	0	-3	N/A	77.94	9.93
Caulobacter crescentus (C. crescentus) - Strain CB15 - Assembly ASM690v1
Tool	Number_of_ORFs	Percent_Difference_of_All_ORFs	Number_of_ORFs_that_Detected_a_Gene	Percentage_of_ORFs_that_Detected_a_Gene	Number_of_Genes_Detected	Percentage_of_Genes_Detected	Median_Length_of_All_ORFs	Median_Length_Difference	Minimum_Length_of_All_ORFs	Minimum_Length_Difference	Maximum_Length_of_All_ORFs	Maximum_Length_Difference	Median_GC_content_of_All_ORFs	Percent_Difference_of_All_ORFs_Median_GC	Median_GC_content_of_Matched_ORFs	Percent_Difference_of_Matched_ORF_GC	Number_of_ORFs_which_Overlap_Another_ORF	Percent_Difference_of_Overlapping_ORFs	Maximum_ORF_Overlap	Median_ORF_Overlap	Number_of_Matched_ORFs_Overlapping_Another_ORF	Percent_Difference_of_Matched_ORFs_Overlapping_Another_ORF	Maximum_Matched_ORF_Overlap	Median_Matched_ORF_Overlap	Number_of_Short-ORFs	Percent_Difference_of_Short-ORFs	Number_of_Short-Matched-ORFs	Percent_Difference_of_Short-Matched-ORFs	Number_of_Perfect_Matches	Percentage_of_Perfect_Matches	Number_of_Perfect_Starts	Percentage_of_Perfect_Starts	Number_of_Perfect_Stops	Percentage_of_Perfect_Stops	Number_of_Out_of_Frame_ORFs	Number_of_Matched_ORFs_Extending_a_Coding_Region	Percentage_of_Matched_ORFs_Extending_a_Coding_Region	Number_of_Matched_ORFs_Extending_Start_Region	Percentage_of_Matched_ORFs_Extending_Start_Region	Number_of_Matched_ORFs_Extending_Stop_Region	Percentage_of_Matched_ORFs_Extending_Stop_Region	Number_of_All_ORFs_on_Positive_Strand	Percentage_of_All_ORFs_on_Positive_Strand	Number_of_All_ORFs_on_Negative_Strand	Percentage_of_All_ORFs_on_Negative_Strand	Median_Start_Difference_of_Matched_ORFs	Median_Stop_Difference_of_Matched_ORFs	ATG_Start_Percentage	GTG_Start_Percentage
Caulobacter Details	Number of Protein Coding Genes: 3737						827	N/A	92	N/A	7439	N/A	67.52				1223		2246	3	1223		2246	3	284				N/A	N/A	N/A	N/A	N/A	N/A	N/A	N/A	N/A	N/A	N/A	N/A	N/A	1828		1909		N/A	N/A	68.58	17.69
GeneMarkS	3747	0.27	3438	91.75	3438	92	812	-1.81	80	-13.04	7409	-0.4	67.69	0.25	67.71	0.29	943	-22.89	114	3	834	-31.81	72	3	353	24.3	217	-23.59	2268	65.97	2268	65.97	3438	100	60	0	0	292	8.49	0	0	0	0	1	0	-3	N/A	79.93	11.37
Prodigal	3704	-0.88	3433	92.68	3433	91.87	827	0	89	-3.26	7409	-0.4	67.69	0.26	67.71	0.29	974	-20.36	66	3	878	-28.21	66	3	305	7.39	205	-27.82	2393	69.71	2393	69.71	3433	100	56	0	0	301	8.77	0	0	0	0	1	0	-3	N/A	84.48	10.1
MetaGeneAnnotator	3766	0.78	3460	91.87	3460	92.59	812	-1.81	119	29.35	7409	-0.4	67.65	0.2	67.69	0.26	1064	-13	119	3	910	-25.59	112	3	337	18.66	209	-26.41	2375	68.64	2375	68.64	3460	100	61	0	0	301	8.7	0	0	0	0	1	0	-3	N/A	79.63	12.4
GeneMarkS-2	3715	-0.59	3447	92.79	3447	92.24	827	0	89	-3.26	7409	-0.4	67.69	0.26	67.71	0.29	971	-20.61	247	3	888	-27.39	247	3	308	8.45	204	-28.17	2335	67.74	2335	67.74	3447	100	57	0	0	277	8.04	0	0	0	0	1	0	-3	N/A	82.18	11.2
MetaGeneMark	3770	0.88	3469	92.02	3469	92.83	812	-1.81	65	-29.35	7409	-0.4	67.61	0.13	67.68	0.24	981	-19.79	121	3	876	-28.37	121	3	358	26.06	220	-22.54	2372	68.38	2372	68.38	3469	100	61	0	0	342	9.86	0	0	0	0	1	0	-3	N/A	83.05	10.13
GeneMark.hmm/E. coli Model	3873	3.64	3468	89.54	3468	92.8	791	-4.35	80	-13.04	7409	-0.4	67.57	0.07	67.68	0.24	1182	-3.35	69	3	928	-24.12	69	3	414	45.77	218	-23.24	2351	67.79	2351	67.79	3468	100	69	0	0	315	9.08	0	0	0	0	1	0	-3	N/A	82.98	11.33
GeneMark_HA	3748	0.29	3445	91.92	3445	92.19	815	-1.45	89	-3.26	7409	-0.4	67.64	0.18	67.68	0.24	1020	-16.6	72	3	897	-26.66	72	3	340	19.72	215	-24.3	2384	69.2	2384	69.2	3445	100	58	0	0	356	10.33	0	0	0	0	1	0	3	N/A	84.07	9.9
FragGeneScan	3640	-2.6	3313	91.02	3313	88.65	836	1.09	128	39.13	7409	-0.4	67.73	0.31	67.7	0.27	693	-43.34	2675	3	615	-49.71	2675	3	303	6.69	175	-38.38	2186	65.98	2186	65.98	3313	100	73	0	0	369	11.14	0	0	0	0	1	0	3	N/A	80.27	12.86
GLIMMER-3	3775	1.02	3409	90.3	3409	91.22	806	-2.54	113	22.83	7409	-0.4	67.68	0.24	67.75	0.34	993	-18.81	49	3	837	-31.56	49	3	407	43.31	208	-26.76	2204	64.65	2204	64.65	3409	100	57	0	0	312	9.15	0	0	0	0	1	0	-3	N/A	37.25	9.67
MetaGene	3724	-0.35	3429	92.08	3429	91.76	821	-0.73	179	94.57	7409	-0.4	67.64	0.18	67.7	0.26	1029	-15.86	119	3	908	-25.76	112	3	310	9.15	186	-34.51	2379	69.38	2379	69.38	3429	100	59	0	0	376	10.97	0	0	0	0	1	0	-6	N/A	80.21	11.28
GeneMark.hmm/S. Aureus Model	4287	14.72	1026	23.93	1026	27.46	647	-21.77	80	-13.04	5303	-28.71	67.38	-0.2	67.63	0.17	1000	-18.23	88	1	204	-83.32	31	3	667	134.86	75	-73.59	569	55.46	569	55.46	1026	100	1216	0	0	162	15.79	0	0	0	0	0	0	6	N/A	43.48	41.54
FGENESB/E. coli Model	3712	-0.67	3296	88.79	3296	88.2	806	-2.54	65	-29.35	7409	-0.4	67.64	0.18	67.72	0.3	946	-22.65	797	3	734	-39.98	797	3	355	25	171	-39.79	2127	64.53	2127	64.53	3296	100	62	0	0	269	8.16	0	0	0	0	1	0	-3	N/A	82.68	12.61
Augutus/S. Aureus Model	2634	-29.52	147	5.58	147	3.93	656	-20.68	80	-13.04	5303	-28.71	67.13	-0.57	66.02	-2.22	131	-89.29	1991	3	7	-99.43	3	3	361	27.11	8	-97.18	57	38.78	57	38.78	147	100	833	0	0	48	32.65	0	0	0	0	0	0	-21	N/A	23.96	55.62
Augutus/E. coli Model	3657	-2.14	3401	93	3401	91.01	836	1.09	80	-13.04	7409	-0.4	67.69	0.26	67.71	0.29	909	-25.67	1688	3	797	-34.83	58	3	253	-10.92	172	-39.44	2277	66.95	2277	66.95	3401	100	64	0	0	310	9.11	0	0	0	0	1	0	-3	N/A	81.3	12.03
FGENESB/S. Aureus Model	4989	33.5	238	4.77	238	6.37	470	-43.17	62	-32.61	5393	-27.5	67.7	0.27	67.02	-0.74	1975	61.49	853	13	4	-99.67	228	1.5	1505	429.93	22	-92.25	82	34.45	82	34.45	238	100	1058	0	0	74	31.09	0	0	0	0	1	0	-9	N/A	31.23	48.09
TransDecoder	3228	-13.62	2962	91.76	2962	79.26	893	7.98	299	225	7409	-0.4	67.7	0.26	67.71	0.28	745	-39.08	163	3	631	-48.41	163	3	7	-97.54	4	-98.59	1904	64.28	1904	64.28	2962	100	86	0	0	420	14.18	0	0	0	0	1	0	6	N/A	100	0
EasyGene/E. coli Model	3030	-18.92	2645	87.29	2645	70.78	896	8.34	89	-3.26	7409	-0.4	67.85	0.49	67.81	0.43	800	-34.59	2804	3	458	-62.55	64	3	39	-86.27	26	-90.85	1641	62.04	1641	62.04	2645	100	57	0	0	213	8.05	0	0	0	0	1	0	-3	N/A	76.47	16.27
GeneMark/E. coli Model	3814	2.06	3254	85.32	3254	87.08	836	1.09	38	-58.7	7439	0	67.55	0.05	67.68	0.25	1761	43.99	3929	3	1200	-1.88	2612	3	466	64.08	130	-54.23	2123	65.24	2123	65.24	3254	100	65	0	0	752	23.11	0	0	0	0	1	0	-3	N/A	67.93	32.07
Augustus/H. sapiens Model	3639	-2.62	2943	80.87	2943	78.75	802	-3.02	2	-97.83	7409	-0.4	67.68	0.25	67.71	0.29	144	-88.23	2703	18.5	0	N/A	N/A	N/A	343	20.77	115	-59.51	1230	41.79	1332	45.26	2735	92.93	167	0	0	293	9.96	0	0	0	0	0	0	-4	12	88.79	0.25
GeneMark/S. Aureus Model	953	-74.5	7	0.73	7	0.19	251	-69.65	32	-65.22	2573	-65.41	66.67	-1.26	64	-5.21	32	-97.38	492	1.5	0	N/A	N/A	N/A	554	95.07	3	-98.94	1	14.29	1	14.29	7	100	58	0	0	0	0	0	0	0	0	0	0	-21	N/A	21.51	78.49
EasyGene/S. Aureus Model	938	-74.9	22	2.35	22	0.59	507.5	-38.63	167	81.52	1976	-73.44	67.97	0.66	65.94	-2.34	109	-91.09	1174	16	0	N/A	N/A	N/A	9	-96.83	0	N/A	10	45.45	10	45.45	22	100	125	0	0	1	4.55	0	0	0	0	0	0	-7.5	N/A	25.69	51.71
Staph - GC% = 32.9% Gram-Positive http://bacteria.ensembl.org/Staphylococcus_aureus/Info/Index
Escherichia coli (E. coli) K-12 - Strain ER3413 - Assembly ASM80076v1
Tool	Number_of_ORFs	Percent_Difference_of_All_ORFs	Number_of_ORFs_that_Detected_a_Gene	Percentage_of_ORFs_that_Detected_a_Gene	Number_of_Genes_Detected	Percentage_of_Genes_Detected	Median_Length_of_All_ORFs	Median_Length_Difference	Minimum_Length_of_All_ORFs	Minimum_Length_Difference	Maximum_Length_of_All_ORFs	Maximum_Length_Difference	Median_GC_content_of_All_ORFs	Percent_Difference_of_All_ORFs_Median_GC	Median_GC_content_of_Matched_ORFs	Percent_Difference_of_Matched_ORF_GC	Number_of_ORFs_which_Overlap_Another_ORF	Percent_Difference_of_Overlapping_ORFs	Maximum_ORF_Overlap	Median_ORF_Overlap	Number_of_Matched_ORFs_Overlapping_Another_ORF	Percent_Difference_of_Matched_ORFs_Overlapping_Another_ORF	Maximum_Matched_ORF_Overlap	Median_Matched_ORF_Overlap	Number_of_Short-ORFs	Percent_Difference_of_Short-ORFs	Number_of_Short-Matched-ORFs	Percent_Difference_of_Short-Matched-ORFs	Number_of_Perfect_Matches	Percentage_of_Perfect_Matches	Number_of_Perfect_Starts	Percentage_of_Perfect_Starts	Number_of_Perfect_Stops	Percentage_of_Perfect_Stops	Number_of_Out_of_Frame_ORFs	Number_of_Matched_ORFs_Extending_a_Coding_Region	Percentage_of_Matched_ORFs_Extending_a_Coding_Region	Number_of_Matched_ORFs_Extending_Start_Region	Percentage_of_Matched_ORFs_Extending_Start_Region	Number_of_Matched_ORFs_Extending_Stop_Region	Percentage_of_Matched_ORFs_Extending_Stop_Region	Number_of_All_ORFs_on_Positive_Strand	Percentage_of_All_ORFs_on_Positive_Strand	Number_of_All_ORFs_on_Negative_Strand	Percentage_of_All_ORFs_on_Negative_Strand	Median_Start_Difference_of_Matched_ORFs	Median_Stop_Difference_of_Matched_ORFs	ATG_Start_Percentage	GTG_Start_Percentage
Escherichia Details	Number of Protein Coding Genes 4052						848	N/A	44	N/A	7076	N/A	50.8				913		447	3	913		447	3	415				N/A	N/A	N/A	N/A	N/A	N/A	N/A	N/A	N/A	N/A	N/A	N/A	N/A	1961		2091		N/A	N/A	90.67	7.5
GeneMarkS	4325	6.74	3953	91.4	3954	97.58	812	-4.25	80	81.82	7019	-0.81	52	-0.29	52.21	0.12	985	7.89	112	3	860	-5.81	112	3	538	29.64	339	-18.31	3540	89.55	3540	89.55	3954	100.03	3	0	0	118	2.99	0	0	0	0	0	0	-6	N/A	90.01	7.42
Prodigal	4263	5.21	3971	93.15	3973	98.05	824	-2.83	89	102.27	7103	0.38	52.06	-0.18	52.21	0.11	994	8.87	143	3	878	-3.83	112	3	468	12.77	346	-16.63	3737	94.11	3737	94.11	3973	100.05	2	0	0	97	2.44	0	0	0	0	0	0	-3	N/A	90.62	7.65
MetaGeneAnnotator	4259	5.11	3915	91.92	3916	96.64	815	-3.89	128	190.91	7019	-0.81	52.08	-0.13	52.24	0.17	1000	9.53	119	3	837	-8.32	112	3	475	14.46	326	-21.45	3565	91.06	3565	91.06	3916	100.03	2	0	0	132	3.37	0	0	0	0	0	0	-3	N/A	87.79	8.45
GeneMarkS-2	4208	3.85	3946	93.77	3947	97.41	833	-1.77	89	102.27	7103	0.38	52.12	-0.06	52.23	0.15	963	5.48	151	3	860	-5.81	112	3	416	0.24	324	-21.93	3671	93.03	3671	93.03	3947	100.03	1	0	0	83	2.1	0	0	0	0	0	0	-6	N/A	89.19	8.27
MetaGeneMark	4241	4.66	3922	92.48	3924	96.84	827	-2.48	77	75	6956	-1.7	52.04	-0.2	52.2	0.1	1012	10.84	47	3	883	-3.29	47	3	440	6.02	301	-27.47	3229	82.33	3229	82.33	3924	100.05	10	0	0	468	11.93	0	0	0	0	0	0	-6	N/A	89.41	7.22
GeneMark.hmm/E. coli Model	4319	6.59	3951	91.48	3952	97.53	812	-4.25	80	81.82	7019	-0.81	52.01	-0.27	52.21	0.12	985	7.89	112	3	859	-5.91	112	3	533	28.43	338	-18.55	3542	89.65	3542	89.65	3952	100.03	2	0	0	114	2.89	0	0	0	0	0	0	-6	N/A	89.88	7.46
GeneMark_HA	4253	4.96	3859	90.74	3861	95.29	824	-2.83	89	102.27	7076	0	52	-0.29	52.17	0.04	1048	14.79	47	3	891	-2.41	47	3	449	8.19	277	-33.25	3027	78.44	3027	78.44	3861	100.05	17	0	0	549	14.23	0	0	0	0	0	0	3	N/A	90.92	6.49
FragGeneScan	4501	11.08	3877	86.14	3879	95.73	785	-7.43	128	190.91	7103	0.38	52	-0.29	52.2	0.09	823	-9.86	1049	3	699	-23.44	169	3	708	70.6	301	-27.47	3368	86.87	3368	86.87	3879	100.05	18	0	0	449	11.58	0	0	0	0	0	0	-3	N/A	86.25	8.78
GLIMMER-3	4337	7.03	3874	89.32	3875	95.63	812	-4.25	113	156.82	6956	-1.7	52	-0.29	52.25	0.2	978	7.12	49	3	803	-12.05	49	3	613	47.71	307	-26.02	2997	77.36	2997	77.36	3875	100.03	3	0	0	384	9.91	0	0	0	0	0	0	-3	N/A	41.99	6.64
MetaGene	4080	0.69	3797	93.06	3798	93.73	839	-1.06	97	120.45	7019	-0.81	52.19	0.07	52.3	0.29	952	4.27	113	3	831	-8.98	112	3	367	-11.57	275	-33.73	2986	78.64	2986	78.64	3798	100.03	3	0	0	425	11.19	0	0	0	0	0	0	-3	N/A	89.29	6.79
GeneMark.hmm/S. Aureus Model	4315	6.49	3832	88.81	3833	94.6	809	-4.6	80	81.82	7076	0	52.06	-0.18	52.18	0.06	994	8.87	66	3	822	-9.97	55	3	536	29.16	296	-28.67	3386	88.36	3386	88.36	3833	100.03	18	0	0	146	3.81	0	0	0	0	0	0	-3	N/A	84.96	9.59
FGENESB/E. coli Model	4386	8.24	3883	88.53	3884	95.85	788	-7.08	62	40.91	7076	0	51.97	-0.35	52.25	0.2	1014	11.06	208	3	796	-12.81	112	3	635	53.01	339	-18.31	3506	90.29	3507	90.32	3883	100	4	0	0	101	2.6	1	0.03	0	0	0	0	-3	-3	89.81	7.46
Augutus/S. Aureus Model	3999	-1.31	3549	88.75	3550	87.61	836	-1.42	65	47.73	7076	0	52.04	-0.21	52.14	-0.02	643	-29.57	3653	3	504	-44.8	47	3	414	-0.24	232	-44.1	2853	80.39	2853	80.39	3550	100.03	9	0	0	213	6	0	0	0	0	0	0	-3	N/A	79.14	13.15
Augutus/E. coli Model	4053	0.02	3812	94.05	3813	94.1	851	0.35	71	61.36	7076	0	52.25	0.2	52.32	0.33	900	-1.42	1403	3	797	-12.71	55	3	363	-12.53	291	-29.88	3533	92.68	3533	92.68	3813	100.03	1	0	0	96	2.52	0	0	0	0	0	0	-3	N/A	89.56	8.02
FGENESB/S. Aureus Model	4231	4.42	2249	53.16	2249	55.5	557	-34.32	62	40.91	7076	0	52.24	0.18	51.79	-0.68	406	-55.53	195	3	123	-86.53	112	3	941	126.75	163	-60.72	1468	65.27	1468	65.27	2249	100	17	0	0	128	5.69	0	0	0	0	0	0	-6	N/A	67.95	20.7
TransDecoder	3664	-9.58	3493	95.33	3494	86.23	917	8.14	299	579.55	7103	0.38	52.38	0.44	52.41	0.5	794	-13.03	112	3	762	-16.54	112	3	9	-97.83	9	-97.83	2722	77.93	2722	77.93	3494	100.03	6	0	0	530	15.17	0	0	0	0	0	0	-3	N/A	100	0
EasyGene/E. coli Model	3993	-1.46	3805	95.29	3806	93.93	869	2.48	59	34.09	7076	0	52.25	0.2	52.32	0.32	892	-2.3	1202	3	822	-9.97	112	3	247	-40.48	220	-46.99	3520	92.51	3520	92.51	3806	100.03	1	0	0	76	2	0	0	0	0	0	0	-3	N/A	88.93	8.26
GeneMark/E. coli Model	3809	-6	3568	93.67	3569	88.08	878	3.54	41	-6.82	7103	0.38	52.4	0.48	52.47	0.61	1128	23.55	1269	3	1011	10.73	285	3	292	-29.64	193	-53.49	2582	72.37	2582	72.37	3569	100.03	1	0	0	891	24.97	0	0	0	0	0	0	3	N/A	79.78	20.22
Augustus/H. sapiens Model	3690	-8.93	2442	66.18	2443	60.29	815	-3.89	2	-95.45	7076	0	52.8	1.25	52.9	1.44	261	-71.41	3722	18	4	-99.56	18	1.5	499	20.24	52	-87.47	838	34.32	917	37.55	2243	91.85	288	1	0.04	203	8.31	1	0.04	0	0	0	0	-15	20	79.65	0.76
GeneMark/S. Aureus Model	2896	-28.53	1619	55.9	1619	39.96	555.5	-34.49	38	-13.64	7103	0.38	51.82	-0.63	51.56	-1.12	467	-48.85	3817	3	121	-86.75	129	3	903	117.59	99	-76.14	1038	64.11	1038	64.11	1619	100	3	0	0	326	20.14	0	0	0	0	0	0	6	N/A	64.88	35.12
EasyGene/S. Aureus Model	2083	-48.59	1276	61.26	1276	31.49	614	-27.59	113	156.82	5117	-27.69	51.11	-1.99	50.42	-3.33	171	-81.27	1795	3	58	-93.65	55	3	86	-79.28	57	-86.27	1024	80.25	1024	80.25	1276	100	2	0	0	28	2.19	0	0	0	0	0	0	-13.5	N/A	77	16.61
Mycoplasma genitalium (M. genitalium) - Strain G37 - Assembly ASM2732v1
Tool	Number_of_ORFs	Percent_Difference_of_All_ORFs	Number_of_ORFs_that_Detected_a_Gene	Percentage_of_ORFs_that_Detected_a_Gene	Number_of_Genes_Detected	Percentage_of_Genes_Detected	Median_Length_of_All_ORFs	Median_Length_Difference	Minimum_Length_of_All_ORFs	Minimum_Length_Difference	Maximum_Length_of_All_ORFs	Maximum_Length_Difference	Median_GC_content_of_All_ORFs	Percent_Difference_of_All_ORFs_Median_GC	Median_GC_content_of_Matched_ORFs	Percent_Difference_of_Matched_ORF_GC	Number_of_ORFs_which_Overlap_Another_ORF	Percent_Difference_of_Overlapping_ORFs	Maximum_ORF_Overlap	Median_ORF_Overlap	Number_of_Matched_ORFs_Overlapping_Another_ORF	Percent_Difference_of_Matched_ORFs_Overlapping_Another_ORF	Maximum_Matched_ORF_Overlap	Median_Matched_ORF_Overlap	Number_of_Short-ORFs	Percent_Difference_of_Short-ORFs	Number_of_Short-Matched-ORFs	Percent_Difference_of_Short-Matched-ORFs	Number_of_Perfect_Matches	Percentage_of_Perfect_Matches	Number_of_Perfect_Starts	Percentage_of_Perfect_Starts	Number_of_Perfect_Stops	Percentage_of_Perfect_Stops	Number_of_Out_of_Frame_ORFs	Number_of_Matched_ORFs_Extending_a_Coding_Region	Percentage_of_Matched_ORFs_Extending_a_Coding_Region	Number_of_Matched_ORFs_Extending_Start_Region	Percentage_of_Matched_ORFs_Extending_Start_Region	Number_of_Matched_ORFs_Extending_Stop_Region	Percentage_of_Matched_ORFs_Extending_Stop_Region	Number_of_All_ORFs_on_Positive_Strand	Percentage_of_All_ORFs_on_Positive_Strand	Number_of_All_ORFs_on_Negative_Strand	Percentage_of_All_ORFs_on_Negative_Strand	Median_Start_Difference_of_Matched_ORFs	Median_Stop_Difference_of_Matched_ORFs	ATG_Start_Percentage	GTG_Start_Percentage
Myco Strain Details	Number of Protein Coding Genes 476						885.5	N/A	113	N/A	5417	N/A	31.44				221		76	7	221		76	7	23				N/A	N/A	N/A	N/A	N/A	N/A	N/A	N/A	N/A	N/A	N/A	N/A	N/A	277		199		N/A	N/A	88.45	7.56
GeneMarkS	1117	134.66	188	16.83	188	39.5	299	-66.23	80	-29.2	3152	-41.81	31.45	0.03	32.89	4.62	221	0	46	3	39	-82.35	28	7	559	2330.43	17	-26.09	115	61.17	148	78.72	153	81.38	1	0	0	9	4.79	0	0	0	0	1	0	19.5	-93	55.24	15.4
Prodigal	995	109.03	190	19.1	190	39.92	335	-62.17	89	-21.24	3152	-41.81	31.5	0.2	32.83	4.42	182	-17.65	135	3	36	-83.71	31	4.5	443	1826.09	19	-17.39	128	67.37	162	85.26	154	81.05	0	0	0	4	2.11	0	0	0	0	1	0	67.5	-85.5	63.12	15.28
MetaGeneAnnotator	882	85.29	185	20.98	185	38.87	368	-58.44	128	13.27	3152	-41.81	31.48	0.14	32.89	4.61	150	-32.13	112	3	32	-85.52	25	4.5	338	1369.57	18	-21.74	125	67.57	157	84.86	151	81.62	0	0	0	1	0.54	0	0	1	0	0	0	31.5	-85.5	62.36	13.27
GeneMarkS-2	992	108.4	186	18.75	186	39.08	335	-62.17	89	-21.24	3152	-41.81	31.85	1.32	32.86	4.53	158	-28.51	61	3	32	-85.52	25	4.5	441	1817.39	17	-26.09	116	62.37	147	79.03	150	80.65	1	0	0	5	2.69	0	0	0	0	1	0	9	-85.5	56.25	15.93
MetaGeneMark	939	97.27	188	20.02	188	39.5	353	-60.14	77	-31.86	3152	-41.81	31.63	0.62	32.86	4.54	168	-23.98	46	3	34	-84.62	25	4.5	384	1569.57	18	-21.74	124	65.96	158	84.04	152	80.85	1	0	0	4	2.13	0	0	0	0	1	0	31.5	-85.5	64.32	15.34
GeneMark.hmm/E. coli Model	736	54.62	168	22.83	168	35.29	395	-55.39	80	-29.2	3152	-41.81	31.52	0.25	32.75	4.18	110	-50.23	34	3	28	-87.33	25	6.5	247	973.91	12	-47.83	105	62.5	129	76.79	139	82.74	0	0	0	2	1.19	0	0	0	0	0	0	36	-96	72.83	9.92
GeneMark_HA	938	97.06	185	19.72	185	38.87	350	-60.47	89	-21.24	3152	-41.81	31.59	0.5	32.77	4.23	168	-23.98	46	3	34	-84.62	25	6.5	386	1578.26	16	-30.43	121	65.41	154	83.24	150	81.08	0	0	0	5	2.7	0	0	0	0	1	0	33	-93	65.46	14.29
FragGeneScan	881	85.08	175	19.86	175	36.76	365	-58.78	128	13.27	3152	-41.81	31.41	-0.08	32.77	4.23	72	-67.42	112	2	20	-90.95	25	1.5	350	1421.74	14	-39.13	117	66.86	147	84	141	80.57	1	0	0	4	2.29	0	0	0	0	0	0	31.5	-85.5	61.07	12.94
GLIMMER-3	1056	121.85	189	17.9	189	39.71	314	-64.54	113	0	3152	-41.81	31.51	0.25	32.89	4.61	202	-8.6	45	3	32	-85.52	25	4.5	502	2082.61	18	-21.74	122	64.55	154	81.48	153	80.95	1	0	0	3	1.59	0	0	0	0	1	0	21	-85.5	24.34	5.78
MetaGene	867	82.14	187	21.57	187	39.29	371	-58.1	70	-38.05	3152	-41.81	31.51	0.24	32.77	4.23	147	-33.48	112	3	31	-85.97	25	6	325	1313.04	18	-21.74	123	65.78	156	83.42	152	81.28	0	0	0	1	0.53	0	0	1	0	0	0	33	-93	65.17	9.11
GeneMark.hmm/S. Aureus Model	852	78.99	175	20.54	175	36.76	371	-58.1	80	-29.2	3152	-41.81	31.53	0.29	32.82	4.41	151	-31.67	46	3	35	-84.16	25	7	320	1291.3	12	-47.83	102	58.29	129	73.71	142	81.14	0	0	0	7	4	0	0	0	0	1	0	24	-96	60.45	13.97
FGENESB/E. coli Model	774	62.61	136	17.57	136	28.57	314	-64.54	62	-45.13	3152	-41.81	32.14	2.23	32.86	4.54	80	-63.8	102	1.5	8	-96.38	25	3.5	372	1517.39	15	-34.78	83	61.03	106	77.94	110	80.88	0	0	0	1	0.74	0	0	0	0	0	0	84	-121.5	73.26	11.63
Augutus/S. Aureus Model	842	76.89	178	21.14	178	37.39	375.5	-57.59	62	-45.13	3152	-41.81	31.57	0.43	32.73	4.13	194	-12.22	641	3	30	-86.43	25	6.5	315	1269.57	15	-34.78	111	62.36	140	78.65	144	80.9	1	0	0	4	2.25	0	0	0	0	1	0	31.5	-85.5	60.69	14.37
Augutus/E. coli Model	230	-51.68	68	29.57	68	14.29	527	-40.49	89	-21.24	3152	-41.81	33.59	6.87	33.56	6.76	8	-96.38	767	1.5	2	-99.1	10	5	44	91.3	3	-86.96	39	57.35	53	77.94	54	79.41	0	0	0	0	0	0	0	0	0	0	0	105	-73.5	76.09	11.74
FGENESB/S. Aureus Model	798	67.65	164	20.55	164	34.45	375.5	-57.59	62	-45.13	3152	-41.81	31.56	0.38	32.7	4.01	118	-46.61	112	3	22	-90.05	25	7	306	1230.43	12	-47.83	96	58.54	123	75	131	79.88	0	0	0	6	3.66	0	0	0	0	1	0	6	-93	61.53	13.66
TransDecoder	448	-5.88	152	33.93	152	31.93	528.5	-40.32	299	164.6	3152	-41.81	31.96	1.65	32.95	4.82	61	-72.4	37	6	26	-88.24	31	6.5	1	-95.65	1	-95.65	102	67.11	132	86.84	122	80.26	0	0	0	3	1.97	0	0	0	0	0	0	69	-94.5	100	0
EasyGene/E. coli Model	386	-18.91	127	32.9	127	26.68	630.5	-28.8	158	39.82	3152	-41.81	31.91	1.52	32.63	3.79	38	-82.81	40	1.5	16	-92.76	25	1.5	19	-17.39	1	-95.65	76	59.84	96	75.59	103	81.1	0	0	0	1	0.79	0	0	0	0	0	0	87	-121.5	70.21	13.99
GeneMark/E. coli Model	3	-99.37	0	0	0	0	110	-87.58	110	-2.65	242	-95.53	47.75	51.89	N/A	N/A	0	N/A	N/A	N/A	0	N/A	N/A	N/A	3	-86.96	0	N/A	0	0	0	0	0	0	0	0	0	0	0	0	0	0	0	0	0	N/A	N/A	33.33	66.67
Augustus/H. sapiens Model	194	-59.24	19	9.79	19	3.99	439.5	-50.37	11	-90.27	2995	-44.71	33.87	7.73	33.63	6.98	12	-94.57	1637	5.5	0	N/A	N/A	N/A	74	221.74	0	N/A	7	36.84	11	57.89	13	68.42	12	0	0	0	0	0	0	0	0	0	0	68	0	32.47	2.06
GeneMark/S. Aureus Model	628	31.93	139	22.13	139	29.2	396.5	-55.22	35	-69.03	3152	-41.81	32.1	2.12	32.74	4.14	92	-58.37	313	3	21	-90.5	34	3	227	886.96	6	-73.91	90	64.75	116	83.45	109	78.42	0	0	0	6	4.32	0	0	0	0	0	0	45	-85.5	76.27	23.73
EasyGene/S. Aureus Model	572	20.17	157	27.45	157	32.98	494	-44.21	143	26.55	3152	-41.81	31.5	0.22	32.67	3.93	75	-66.06	34	3	17	-92.31	25	3	78	239.13	5	-78.26	94	59.87	120	76.43	126	80.25	0	0	0	3	1.91	0	0	0	0	0	0	15	-93	62.41	13.46
Pseudomonas fluorescens (P. fluorescens) - Strain UK4 - Assembly ASM73042v1
Tool	Number_of_ORFs	Percent_Difference_of_All_ORFs	Number_of_ORFs_that_Detected_a_Gene	Percentage_of_ORFs_that_Detected_a_Gene	Number_of_Genes_Detected	Percentage_of_Genes_Detected	Median_Length_of_All_ORFs	Median_Length_Difference	Minimum_Length_of_All_ORFs	Minimum_Length_Difference	Maximum_Length_of_All_ORFs	Maximum_Length_Difference	Median_GC_content_of_All_ORFs	Percent_Difference_of_All_ORFs_Median_GC	Median_GC_content_of_Matched_ORFs	Percent_Difference_of_Matched_ORF_GC	Number_of_ORFs_which_Overlap_Another_ORF	Percent_Difference_of_Overlapping_ORFs	Maximum_ORF_Overlap	Median_ORF_Overlap	Number_of_Matched_ORFs_Overlapping_Another_ORF	Percent_Difference_of_Matched_ORFs_Overlapping_Another_ORF	Maximum_Matched_ORF_Overlap	Median_Matched_ORF_Overlap	Number_of_Short-ORFs	Percent_Difference_of_Short-ORFs	Number_of_Short-Matched-ORFs	Percent_Difference_of_Short-Matched-ORFs	Number_of_Perfect_Matches	Percentage_of_Perfect_Matches	Number_of_Perfect_Starts	Percentage_of_Perfect_Starts	Number_of_Perfect_Stops	Percentage_of_Perfect_Stops	Number_of_Out_of_Frame_ORFs	Number_of_Matched_ORFs_Extending_a_Coding_Region	Percentage_of_Matched_ORFs_Extending_a_Coding_Region	Number_of_Matched_ORFs_Extending_Start_Region	Percentage_of_Matched_ORFs_Extending_Start_Region	Number_of_Matched_ORFs_Extending_Stop_Region	Percentage_of_Matched_ORFs_Extending_Stop_Region	Number_of_All_ORFs_on_Positive_Strand	Percentage_of_All_ORFs_on_Positive_Strand	Number_of_All_ORFs_on_Negative_Strand	Percentage_of_All_ORFs_on_Negative_Strand	Median_Start_Difference_of_Matched_ORFs	Median_Stop_Difference_of_Matched_ORFs	ATG_Start_Percentage	GTG_Start_Percentage
Pseudomonas Details	5178						863	N/A	116	N/A	13961	N/A	61.25				1251		80	3	1251		80	3	406				N/A	N/A	N/A	N/A	N/A	N/A	N/A	N/A	N/A	N/A	N/A	N/A	N/A	N/A	N/A	N/A	N/A	N/A	N/A	88.55	7.55
GeneMarkS	5513	6.47	5141	93.25	5141	99.29	839	-2.78	80	-31.03	13961	0	61.11	-0.22	61.31	0.1	1355	8.31	73	3	1203	-3.84	46	3	596	46.8	405	-0.25	4474	87.03	4474	87.03	5141	100	3	0	0	202	3.93	0	0	0	0	0	0	6	N/A	87.57	8.63
Prodigal	5421	4.69	5100	94.08	5100	98.49	863	0	89	-23.28	13961	0	61.13	-0.2	61.3	0.08	1414	13.03	167	3	1251	0	80	3	494	21.67	367	-9.61	4736	92.86	4736	92.86	5100	100	9	0	0	254	4.98	0	0	0	0	0	0	6	N/A	90.3	7.12
MetaGeneAnnotator	5448	5.21	5096	93.54	5096	98.42	854	-1.04	119	2.59	13835	-0.9	61.15	-0.16	61.31	0.1	1453	16.15	119	3	1244	-0.56	118	3	497	22.41	369	-9.11	4608	90.42	4608	90.42	5096	100	4	0	0	258	5.06	0	0	0	0	0	0	6	N/A	88.12	8.63
GeneMarkS-2	5432	4.91	5112	94.11	5112	98.73	860	-0.35	89	-23.28	13961	0	61.13	-0.19	61.3	0.08	1405	12.31	198	3	1245	-0.48	80	3	477	17.49	359	-11.58	4705	92.04	4705	92.04	5112	100	6	0	0	208	4.07	0	0	0	0	0	0	6	N/A	88.2	8.52
MetaGeneMark	5448	5.21	5089	93.41	5089	98.28	851	-1.39	65	-43.97	13961	0	61.08	-0.27	61.28	0.05	1445	15.51	61	3	1286	2.8	61	3	523	28.82	354	-12.81	4201	82.55	4201	82.55	5089	100	4	0	0	578	11.36	0	0	0	0	0	0	3	N/A	88.29	7.54
GeneMark.hmm/E. coli Model	5644	9	5112	90.57	5112	98.73	827	-4.17	77	-33.62	13961	0	60.99	-0.43	61.26	0.02	1574	25.82	46	3	1259	0.64	46	3	664	63.55	367	-9.61	4512	88.26	4512	88.26	5112	100	22	0	0	312	6.1	0	0	0	0	0	0	-3	N/A	88.66	7.92
GeneMark_HA	5528	6.76	5025	90.9	5025	97.05	836	-3.13	89	-23.28	13961	0	61.04	-0.33	61.27	0.04	1533	22.54	46	3	1296	3.6	46	3	573	41.13	348	-14.29	4061	80.82	4061	80.82	5025	100	56	0	0	659	13.11	0	0	0	0	0	0	3	N/A	88.97	7.49
FragGeneScan	5516	6.53	5010	90.83	5010	96.76	843.5	-2.26	128	10.34	13961	0	61.08	-0.28	61.27	0.04	1174	-6.16	1289	3	1037	-17.11	944	3	587	44.58	332	-18.23	4274	85.31	4274	85.31	5010	100	32	0	0	555	11.08	0	0	0	0	0	0	3	N/A	86.75	9.1
GLIMMER-3	5454	5.33	4910	90.03	4910	94.82	845	-2.09	113	-2.59	13961	0	61.16	-0.15	61.49	0.39	1385	10.71	47	3	1125	-10.07	46	3	691	70.2	340	-16.26	3672	74.79	3672	74.79	4910	100	4	0	0	528	10.75	0	0	0	0	0	0	3	N/A	37.84	8.09
MetaGene	5366	3.63	5021	93.57	5021	96.97	851	-1.39	142	22.41	12944	-7.28	61.18	-0.12	61.37	0.19	1409	12.63	119	3	1229	-1.76	118	3	495	21.92	358	-11.82	4045	80.56	4045	80.56	5021	100	4	0	0	568	11.31	0	0	0	0	0	0	-3	N/A	86.45	7.9
GeneMark.hmm/S. Aureus Model	7440	43.68	2032	27.31	2032	39.24	545	-36.85	80	-31.03	8102	-41.97	61.11	-0.23	59.29	-3.2	1464	17.03	61	3	316	-74.74	34	3	1655	307.64	218	-46.31	1628	80.12	1840	90.55	1820	89.57	1236	0	0	99	4.87	115	5.66	0	0	0	0	-4.5	10.5	52.34	27.35
FGENESB/E. coli Model	5538	6.95	4945	89.29	4945	95.5	824	-4.52	65	-43.97	13961	0	61.04	-0.33	61.39	0.23	1360	8.71	782	3	1092	-12.71	782	3	677	66.75	338	-16.75	4456	90.11	4456	90.11	4945	100	10	0	0	203	4.11	0	0	0	0	0	0	6	N/A	87.9	8.83
Augutus/S. Aureus Model	5056	-2.36	1063	21.02	1063	20.53	551	-36.15	68	-41.38	8102	-41.97	61.11	-0.22	57.48	-6.16	280	-77.62	1475	3	58	-95.36	21	3	1070	163.55	83	-79.56	756	71.12	756	71.12	1063	100	836	0	0	117	11.01	0	0	0	0	0	0	15	N/A	41.55	36.51
Augutus/E. coli Model	5310	2.55	5004	94.24	5004	96.64	866	0.35	74	-36.21	14024	0.45	61.23	-0.03	61.38	0.22	1263	0.96	3710	3	1148	-8.23	55	3	447	10.1	331	-18.47	4478	89.49	4478	89.49	5004	100	4	0	0	288	5.76	0	0	0	0	0	0	3	N/A	87.4	9.21
FGENESB/S. Aureus Model	7399	42.89	641	8.66	641	12.38	434	-49.71	62	-46.55	8081	-42.12	61.74	0.8	57.49	-6.14	1178	-5.84	512	5	15	-98.8	39	3	2699	564.78	60	-85.22	348	54.29	348	54.29	641	100	650	0	0	103	16.07	0	0	0	0	0	0	12	N/A	39.6	37.15
TransDecoder	4703	-9.17	4403	93.62	4403	85.03	926	7.3	299	157.76	14024	0.45	61.41	0.27	61.48	0.37	1120	-10.47	126	3	995	-20.46	126	3	12	-97.04	10	-97.54	3280	74.49	3280	74.49	4403	100	47	0	0	834	18.94	0	0	0	0	0	0	3	N/A	100	0
EasyGene/E. coli Model	4852	-6.3	4575	94.29	4575	88.35	905	4.87	74	-36.21	13961	0	61.43	0.3	61.52	0.44	1071	-14.39	10899	3	898	-28.22	108	3	157	-61.33	139	-65.76	4027	88.02	4027	88.02	4575	100	11	0	0	178	3.89	0	0	0	0	0	0	6	N/A	85.76	9.71
GeneMark/E. coli Model	5306	2.47	4770	89.9	4770	92.12	872	1.04	35	-69.83	14024	0.45	61.26	0.03	61.44	0.31	2073	65.71	11459	3	1607	28.46	1067	3	589	45.07	247	-39.16	3072	64.4	3072	64.4	4770	100	7	0	0	1561	32.73	0	0	0	0	0	0	3	N/A	72.58	27.42
Augustus/H. sapiens Model	5182	0.08	4086	78.85	4086	78.91	851	-1.39	2	-98.28	13946	-0.11	61.38	0.21	61.54	0.47	296	-76.34	5845	9.5	2	-99.84	16	8	469	15.52	148	-63.55	1945	47.6	2119	51.86	3786	92.66	327	0	0	474	11.6	0	0	0	0	0	0	-9	20	85.3	0.37
GeneMark/S. Aureus Model	2712	-47.62	115	4.24	115	2.22	197	-77.17	32	-72.41	8081	-42.12	60.87	-0.62	53.57	-12.54	186	-85.13	1327	2	4	-99.68	7	1.5	1921	373.15	18	-95.57	76	66.09	76	66.09	115	100	72	0	0	19	16.52	0	0	0	0	0	0	6	N/A	34.59	65.41
EasyGene/S. Aureus Model	822	-84.13	125	15.21	125	2.41	473	-45.19	188	62.07	3308	-76.31	60.56	-1.13	52.8	-13.79	64	-94.88	757	3	5	-99.6	7	3	21	-94.83	6	-98.52	93	74.4	93	74.4	125	100	49	0	0	14	11.2	0	0	0	0	0	0	7.5	N/A	43.55	33.58
Staphylococcus aureus ( S. aureus) - Strain 502A - Assembly ASM59796v1
Tool	Number_of_ORFs	Percent_Difference_of_All_ORFs	Number_of_ORFs_that_Detected_a_Gene	Percentage_of_ORFs_that_Detected_a_Gene	Number_of_Genes_Detected	Percentage_of_Genes_Detected	Median_Length_of_All_ORFs	Median_Length_Difference	Minimum_Length_of_All_ORFs	Minimum_Length_Difference	Maximum_Length_of_All_ORFs	Maximum_Length_Difference	Median_GC_content_of_All_ORFs	Percent_Difference_of_All_ORFs_Median_GC	Median_GC_content_of_Matched_ORFs	Percent_Difference_of_Matched_ORF_GC	Number_of_ORFs_which_Overlap_Another_ORF	Percent_Difference_of_Overlapping_ORFs	Maximum_ORF_Overlap	Median_ORF_Overlap	Number_of_Matched_ORFs_Overlapping_Another_ORF	Percent_Difference_of_Matched_ORFs_Overlapping_Another_ORF	Maximum_Matched_ORF_Overlap	Median_Matched_ORF_Overlap	Number_of_Short-ORFs	Percent_Difference_of_Short-ORFs	Number_of_Short-Matched-ORFs	Percent_Difference_of_Short-Matched-ORFs	Number_of_Perfect_Matches	Percentage_of_Perfect_Matches	Number_of_Perfect_Starts	Percentage_of_Perfect_Starts	Number_of_Perfect_Stops	Percentage_of_Perfect_Stops	Number_of_Out_of_Frame_ORFs	Number_of_Matched_ORFs_Extending_a_Coding_Region	Percentage_of_Matched_ORFs_Extending_a_Coding_Region	Number_of_Matched_ORFs_Extending_Start_Region	Percentage_of_Matched_ORFs_Extending_Start_Region	Number_of_Matched_ORFs_Extending_Stop_Region	Percentage_of_Matched_ORFs_Extending_Stop_Region	Number_of_All_ORFs_on_Positive_Strand	Percentage_of_All_ORFs_on_Positive_Strand	Number_of_All_ORFs_on_Negative_Strand	Percentage_of_All_ORFs_on_Negative_Strand	Median_Start_Difference_of_Matched_ORFs	Median_Stop_Difference_of_Matched_ORFs	ATG_Start_Percentage	GTG_Start_Percentage
Staphylococcus Details	Number of Protein Coding Genes 2478						794	N/A	113	N/A	31421	N/A	33.33				486		44	3	486		44	3	249				N/A	N/A	N/A	N/A	N/A	N/A	N/A	N/A	N/A	N/A	N/A	N/A	N/A	N/A	N/A	N/A	N/A	N/A	N/A	86.8	6.62
GeneMarkS	2580	4.12	2468	95.66	2468	99.6	770	-3.02	80	-29.2	31421	0	33.33	0	33.33	0	530	9.05	52	3	480	-1.23	52	3	337	35.34	241	-3.21	2352	95.3	2352	95.3	2468	100	1	0	0	30	1.22	0	0	0	0	0	0	0	N/A	85.7	6.78
Prodigal	2534	2.26	2457	96.96	2457	99.15	782	-1.51	92	-18.58	31421	0	33.33	0	33.33	0	516	6.17	60	3	486	0	46	3	292	17.27	230	-7.63	2434	99.06	2434	99.06	2457	100	1	0	0	15	0.61	0	0	0	0	0	0	12	N/A	86.86	6.75
MetaGeneAnnotator	2584	4.28	2463	95.32	2463	99.39	770	-3.02	125	10.62	31421	0	33.33	0	33.33	0	537	10.49	85	3	486	0	85	3	340	36.55	240	-3.61	2325	94.4	2325	94.4	2463	100	1	0	0	42	1.71	0	0	0	0	0	0	3	N/A	84.95	7.04
GeneMarkS-2	2546	2.74	2447	96.11	2447	98.75	773	-2.64	89	-21.24	31421	0	33.33	0	33.33	0	498	2.47	64	3	462	-4.94	44	3	307	23.29	229	-8.03	2270	92.77	2270	92.77	2447	100	1	0	0	57	2.33	0	0	0	0	0	0	3	N/A	85.94	7.19
MetaGeneMark	2515	1.49	2434	96.78	2434	98.22	791	-0.38	83	-26.55	31421	0	33.33	0	33.41	0.23	530	9.05	67	3	504	3.7	67	3	274	10.04	213	-14.46	1957	80.4	1957	80.4	2434	100	1	0	0	319	13.11	0	0	0	0	0	0	6	N/A	87.12	8.15
GeneMark.hmm/E. coli Model	2514	1.45	2339	93.04	2339	94.39	774.5	-2.46	80	-29.2	24998	-20.44	33.33	0	33.41	0.24	490	0.82	37	3	451	-7.2	37	3	311	24.9	198	-20.48	1996	85.34	1996	85.34	2339	100	2	0	0	106	4.53	0	0	0	0	0	0	3	N/A	89.22	6.28
GeneMark_HA	2592	4.6	2439	94.1	2439	98.43	773	-2.64	89	-21.24	31421	0	33.33	0	33.33	0	616	26.75	67	3	540	11.11	67	3	346	38.96	216	-13.25	1933	79.25	1933	79.25	2439	100	1	0	0	410	16.81	0	0	0	0	0	0	6	N/A	85.88	8.49
FragGeneScan	2601	4.96	2443	93.93	2443	98.59	770	-3.02	128	13.27	31421	0	33.33	0	33.33	0	435	-10.49	2064	3	418	-13.99	85	3	359	44.18	219	-12.05	2080	85.14	2080	85.14	2443	100	1	0	0	293	11.99	0	0	0	0	0	0	3	N/A	83.04	8.84
GLIMMER-3	2544	2.66	2408	94.65	2408	97.18	773	-2.64	113	0	31421	0	33.33	0	33.44	0.33	426	-12.35	46	3	389	-19.96	46	3	324	30.12	220	-11.65	1822	75.66	1822	75.66	2408	100	1	0	0	301	12.5	0	0	0	0	0	0	6	N/A	40.84	5.9
MetaGene	2545	2.7	2440	95.87	2440	98.47	779	-1.89	149	31.86	31343	-0.25	33.33	0	33.39	0.16	532	9.47	112	3	490	0.82	69	3	302	21.29	229	-8.03	1952	80	1952	80	2440	100	1	0	0	320	13.11	0	0	0	0	0	0	3	N/A	87.62	5.7
GeneMark.hmm/S. Aureus Model	2582	4.2	2468	95.58	2468	99.6	770	-3.02	80	-29.2	31421	0	33.33	0	33.33	0	531	9.26	52	3	484	-0.41	52	3	339	36.14	241	-3.21	2355	95.42	2355	95.42	2468	100	1	0	0	27	1.09	0	0	0	0	0	0	-3	N/A	85.52	6.89
FGENESB/E. coli Model	2628	6.05	2061	78.42	2061	83.17	681.5	-14.17	62	-45.13	28490	-9.33	33.33	0	33.61	0.83	380	-21.81	133	3	258	-46.91	34	3	544	118.47	189	-24.1	1773	86.03	1773	86.03	2061	100	1	0	0	52	2.52	0	0	0	0	0	0	-3	N/A	88.81	6.2
Augutus/S. Aureus Model	2596	4.76	2457	94.65	2457	99.15	770	-3.02	62	-45.13	31421	0	33.33	0	33.33	0	585	20.37	1763	3	478	-1.65	52	3	352	41.37	231	-7.23	2314	94.18	2314	94.18	2457	100	1	0	0	60	2.44	0	0	0	0	0	0	3	N/A	84.78	7.28
Augutus/E. coli Model	1717	-30.71	1492	86.9	1492	60.21	824	3.78	95	-15.93	14774	-52.98	34.22	2.67	34.35	3.06	145	-70.16	2417	3	108	-77.78	31	3	143	-42.57	87	-65.06	1167	78.22	1167	78.22	1492	100	1	0	0	41	2.75	0	0	0	0	0	0	-12	N/A	89.28	6.64
FGENESB/S. Aureus Model	2670	7.75	2463	92.25	2463	99.39	755	-4.91	62	-45.13	31421	0	33.33	0	33.33	0	554	13.99	85	3	477	-1.85	85	3	421	69.08	239	-4.02	2291	93.02	2291	93.02	2463	100	1	0	0	42	1.71	0	0	0	0	0	0	-3	N/A	84.98	6.97
TransDecoder	2207	-10.94	2156	97.69	2156	87.01	860	8.31	299	164.6	30677	-2.37	33.54	0.61	33.56	0.67	426	-12.35	103	3	420	-13.58	103	3	3	-98.8	3	-98.8	1644	76.25	1644	76.25	2156	100	1	0	0	328	15.21	0	0	0	0	0	0	-3	N/A	99.95	0
EasyGene/E. coli Model	2186	-11.78	2115	96.75	2115	85.35	854	7.56	62	-45.13	31421	0	33.59	0.78	33.61	0.83	371	-23.66	3990	3	338	-30.45	58	3	82	-67.07	67	-73.09	1871	88.46	1871	88.46	2115	100	1	0	0	67	3.17	0	0	0	0	0	0	3	N/A	88.52	6.4
GeneMark/E. coli Model	71	-97.13	18	25.35	18	0.73	302	-61.96	89	-21.24	1577	-94.98	38.21	14.63	38.26	14.78	0	N/A	N/A	N/A	0	N/A	N/A	N/A	35	-85.94	5	-97.99	10	55.56	10	55.56	18	100	0	0	0	1	5.56	0	0	0	0	0	0	-30	N/A	66.2	33.8
Augustus/H. sapiens Model	1642	-33.74	822	50.06	822	33.17	798	0.5	2	-98.23	13793	-56.1	34.4	3.2	34.29	2.87	125	-74.28	1650	12	0	N/A	N/A	N/A	252	1.2	6	-97.59	264	32.12	309	37.59	706	85.89	334	0	0	81	9.85	0	0	0	0	0	0	18	71.5	58.77	2.74
GeneMark/S. Aureus Model	2435	-1.74	2333	95.81	2333	94.15	803	1.13	41	-63.72	31421	0	33.47	0.42	33.55	0.66	553	13.79	3816	3	519	6.79	145	3	241	-3.21	174	-30.12	1627	69.74	1627	69.74	2333	100	1	0	0	602	25.8	0	0	0	0	0	0	3	N/A	81.48	18.48
EasyGene/S. Aureus Model	1256	-49.31	1222	97.29	1222	49.31	803	1.13	80	-29.2	31421	0	33.33	0	33.33	0	244	-49.79	2781	3	237	-51.23	85	3	117	-53.01	100	-59.84	1153	94.35	1153	94.35	1222	100	1	0	0	19	1.55	0	0	0	0	0	0	-3	N/A	85.11	6.85
[truncated: 23 more columns]
